# Supplementary material
Source: ML conference proceedings conference paper supplement (https://openreview.net/forum?id=l7aekTjF6CO)
Supplement: supplementary_material [file attachment]

---

**ALGORITHM 2:** RANDOMDICTATOR<sub>k,q</sub>

---

- 1: Pick  $i \in N$  uniformly at random
  - 2: Let  $X \leftarrow \text{top}_q(i, N; d)$  // Ensure that  $i \in X$
  - 3: Pick  $S \in \mathcal{S}_{k-q}(N \setminus X)$  uniformly at random
  - 4: **return**  $X \cup S$
- 

**A Proof of Theorem 3**

*Proof.* Assume that  $n > 2 \cdot \max\{\sqrt{kq/\epsilon}, k+1\}$ , and let  $m = \lfloor k/q \rfloor - 1$ . Consider the real line, and suppose there are sets of  $q$  individuals at each position in  $\{1, 2, \dots, m\}$ , denoted by  $X_1, \dots, X_m$ , respectively, and the set of remaining  $n - mq$  individuals, denoted by  $X_{m+1}$ , is at position  $m+1$ . The optimal panel  $P^*$  would have at least  $q$  people from each position, i.e.,  $|P^* \cap X_i| \geq q$  for all  $i \in [m+1]$ . The  $q$ -cost of each person for  $P^*$  is 0 as at least  $q$  people are selected from her own position. Hence,  $\text{SC}_q(P^*) = 0$ .

Turning to the analysis of  $\mathcal{A}_{k,q}$ , we claim that

$$\mathbb{E}_{P \sim \mathcal{A}_{k,q}}[|X_{m+1} \cap P|] \geq q + (k \bmod q) + \epsilon. \quad (2)$$

To prove this, note that since each individual is included with a marginal probability of at least  $\frac{q + (k \bmod q)}{n} + \epsilon$ , we have

$$\begin{aligned} \mathbb{E}_{P \sim \mathcal{A}_{k,q}}[|X_{m+1} \cap P|] &\geq \left( \frac{q + (k \bmod q)}{n} + \epsilon \right) (n - mq) \\ &= q + (k \bmod q) - \frac{mq \cdot (q + (k \bmod q))}{n} + (n - mq) \cdot \epsilon \end{aligned}$$

We will show that the right hand side is at least  $q + (k \bmod q) + \epsilon$ . Because  $mq < k$ ,  $q + k \bmod q < 2q$ , and  $n - mq > n - k \geq n/2 + 1$ , the right hand side is at least

$$q + (k \bmod q) - \frac{qk}{n/2} + n\epsilon/2 + \epsilon \geq q + (k \bmod q) + \epsilon,$$

where the inequality follows from our choice of  $n > 2\sqrt{kq/\epsilon}$ . This establishes Equation (2).

Now, as the panel size is  $k$ , it holds that  $\sum_{i \in [m+1]} \mathbb{E}_{P \sim \mathcal{A}_{k,q}}[|X_i \cap P|] = k$ . By Equation (2),

$$\sum_{i \in [m]} \mathbb{E}_{P \sim \mathcal{A}_{k,q}}[|X_i \cap P|] < k - (q + (k \bmod q)) - \epsilon = mq - \epsilon.$$

Therefore, there exists  $i \in [m]$  such that  $\mathbb{E}_{P \sim \mathcal{A}_{k,q}}[|X_i \cap P|] \leq q - \epsilon/q$ . Using Markov's inequality,

$$\Pr_{P \sim \mathcal{A}_{k,q}}(|X_i \cap P| \geq q) \leq \frac{q - \epsilon/q}{q} \leq 1 - \epsilon.$$

Thus, with probability at least  $\epsilon$ , less than  $q$  people are selected from position  $i$ , in which case the  $q$ -cost of each person in  $X_i$  will be at least 1. Hence,  $\mathbb{E}_{P \sim \mathcal{A}_{k,q}}[\text{SC}_q(\mathcal{A}_{k,q})] \geq q\epsilon$  while  $\text{SC}_q(P^*) = 0$ .  $\square$

**B Tradeoffs between Representation and Fairness**

We start with the case of  $q > k/2$  and show that a simple algorithm, which is a variant of the natural *random dictatorship* rule, provides constant representation by sacrificing some quantity of perfect fairness. Specifically, the algorithm RANDOMDICTATOR<sub>k,q</sub>, presented as Algorithm 2, works as follows: Given an instance  $d$ , it chooses an individual  $i$  from the underlying population uniformly at random, and returns the panel  $P = \text{top}_q(i, N; d) \cup S$ , where  $\text{top}_q(i, N; d)$  is the set of  $q$  people closest to  $i$  (we break ties in a way to ensure that this contains  $i$  herself), and  $S$  is a panel of size  $k - q$  chosen uniformly at random from the remaining people.

**Theorem 6.** *For any  $q > k/2$ , it holds that*

$$\text{repr}_q(\text{RANDOMDICTATOR}_{k,q}) \geq \frac{1}{3} \quad \text{and} \quad \text{fairness}(\text{RANDOMDICTATOR}_{k,q}) \geq \frac{k - q + 1}{k}.$$

*Proof.* We start by proving the fairness guarantee of the algorithm. Note that each individual  $i$  is included in the panel  $P$  returned by  $\text{RANDOMDICTATOR}_{k,q}$  either if  $i$  is selected at the first step, which happens with probability  $1/n$ , or if  $i$  is not selected in the first step, it is selected in the second step with probability at least  $(k-q)/(n-q)$ . Hence, the probability of  $i$  being selected is at least  $(1/n) + (1-1/n) \cdot (k-q)/(n-q) \geq (k-q+1)/n$ , yielding  $\text{fairness}(\text{RANDOMDICTATOR}_{k,q}) \geq (k-q+1)/k$ .

For  $q > k/2$ , Caragiannis et al. [13] (Corollary 2) show that random dictatorship, i.e. returning a panel minimizing  $q$ -cost to a randomly selected individual  $i$ , achieves a representation of at least  $1/3$ . The panel returned by  $\text{RANDOMDICTATOR}_{k,q}$  consists of  $q$  closest neighbors of  $i$  which obtains the minimum  $q$ -cost with respect to  $i$ , and fills the other  $k-q$  members of this panel randomly which does not affect the  $q$ -cost of the returned panel to  $i$ . Hence,  $\text{RANDOMDICTATOR}_{k,q}$  can be seen as a variant of the *random dictatorship* rule which randomly breaks ties between top panel choices of a randomly selected individual.  $\square$

Now, we turn our attention to the case that  $q \leq k/2$ . In Section 4, we introduced  $\text{RANDOMREPLACE}_q$  with fairness  $q/k$  and representation  $\alpha/(q+1)$  if given an  $\alpha$ -representative panel. In fact, if we replace  $q$  with any  $r \in [q]$ , we can show that the algorithm provides representation of at least  $\alpha/(r+1)$  with fairness  $r/k$ . Essentially,  $\text{RANDOMREPLACE}_r$  chooses a subset  $S$  of the underlying population with size  $r$  instead of  $q$  uniformly at random in Line 1 of Algorithm 1.

**Proposition 1.** *For any  $q \in [k]$ ,  $r \in [q]$ , and panel  $P$  with  $\text{repr}_q(P) = \alpha$  it holds that*

$$\text{repr}_q(\text{RANDOMREPLACE}_r(P)) \geq \frac{\alpha}{r+1} \quad \text{and} \quad \text{fairness}(\text{RANDOMREPLACE}_r) \geq \frac{r}{k}.$$

We omit the proof of this proposition as it is essentially identical to the proof of Theorem 4 with  $q$  replaced by  $r$  in the appropriate places.

## C Average Cost Function

Let  $c_{\text{avg}}(i, P) = \frac{1}{k} \sum_{j \in P} d(i, j)$  denote the average cost of panel  $P$  of size  $k$  to an individual  $i$ . Similarly, define  $\text{SC}_{\text{avg}}(P) = \sum_{i \in N} c_{\text{avg}}(i, P)$ , and let  $\text{repr}_{\text{avg}}(\mathcal{A}_k)$  denote the representation of a selection algorithm  $\mathcal{A}_k$  with respect to the average cost function. It turns out that uniform selection (or any algorithm with perfect fairness) performs very well with the  $\text{repr}_{\text{avg}}$  objective and achieves a representation of  $1/2$ .

**Proposition 2.** *For all  $k \geq 1$ , uniform selection satisfies  $\text{repr}_{\text{avg}}(\mathcal{U}_k) > 1/2$ .*

*Proof.* Sort the population as  $N = (i_1, i_2, \dots, i_n)$  in a non-decreasing order of  $\text{SC}(i_\ell) = \sum_{i \in N} d(i, i_\ell)$ , so that  $\text{SC}(i_1) \leq \text{SC}(i_2) \leq \dots \leq \text{SC}(i_n)$ . Note that for any panel  $P$ ,  $\text{SC}_{\text{avg}}(P) = \frac{1}{k} \sum_{i \in P} \text{SC}(i)$ , so the optimal panel is  $P^* = \{i_1, \dots, i_k\}$ . Then,

$$\text{SC}_{\text{avg}}(P^*) = \frac{1}{k} \sum_{i_\ell \in P^*} \text{SC}(i_\ell) \geq \min_{i_\ell \in P^*} \text{SC}(i_\ell) = \text{SC}(i_1).$$

Note that  $\{i_1\} = \min_{P' \in S_{k=1}(N)} \text{SC}_{q=1}(P')$  is the optimal panel for the case where  $q = k = 1$ . As  $q > k/2$  in this scenario, by Lemma 1, we have

$$\text{SC}_{\text{avg}}(P^*) \geq \text{SC}(i_1) = \text{SC}_1(\{i_1\}) \geq \frac{1}{2(n-1)} \sum_{i \in N} \sum_{j \in N \setminus \{i\}} d(i, j).$$

The average social cost of uniform selection is

$$\begin{aligned} \mathbb{E}[\text{SC}_{\text{avg}}(\mathcal{U}_k(N))] &= \frac{1}{k} \sum_{i \in N} \sum_{j \in N} d(i, j) \cdot \Pr_{P \sim \mathcal{U}_k}[j \in P] \\ &= \frac{1}{k} \sum_{i \in N} \sum_{j \in N \setminus \{i\}} d(i, j) \cdot \frac{k}{n}, \end{aligned}$$

where in the last transition we used the fact that  $d(i, i) = 0$  and the marginal inclusion probabilities are equal to  $k/n$ . Putting all together, we have that  $\text{repr}_{\text{avg}}(\mathcal{U}_k) \geq \frac{n}{2(n-1)} > \frac{1}{2}$ .  $\square$

## D Experimental Results

### D.1 Experiment Plots

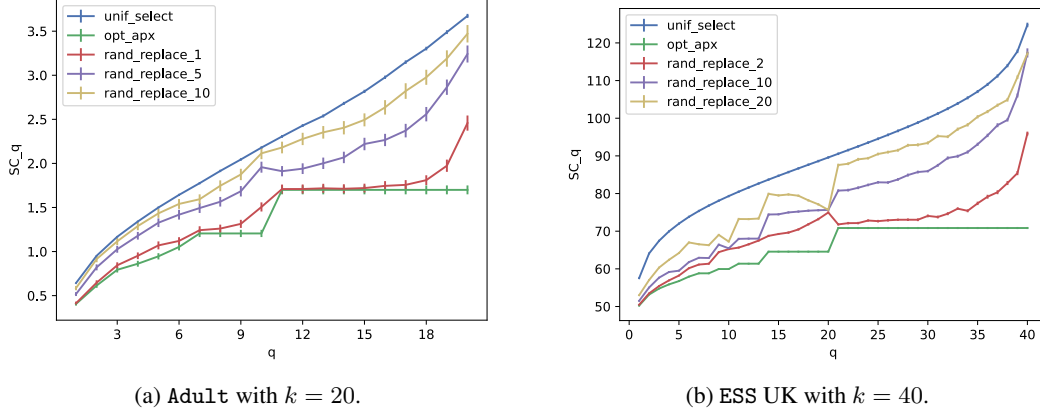

Figure 4: Comparison of different algorithm for fixed  $k$ , where `RANDOMREPLACEr` is applied to the panel selected by `OPTPROXY`. As  $r$  ranges from 0 to  $k$ , the  $q$ -social cost of `RANDOMREPLACEr` interpolates between that of `OPTPROXY` and `UNIFORMSELECTION`.

### D.2 Computation Time of OPTPROXY

The most computationally expensive task in our experiment is computing `OPTPROXY`, which is used as a subroutine in the `RANDOMREPLACE` method. We report the running time of our implementation, as described in Section 5, for low to very high values of  $k$ . We used the ESS UK dataset with  $n = 2204$  and a standard laptop (quad-core, 1.7GHz CPU, 16GB RAM). The computation took less than 15 seconds for  $k = 100$ , which includes computing the pair-wise distance matrix (5 seconds) and running `OPTPROXY` (7 seconds). `OPTPROXY` itself scales well for practical values of  $k$  as shown in Table 1.

Table 1: Runtime of `OPTPROXY` on ESS UK with different values of  $k$ . The reported time is the maximum over all  $q \in [k]$ .

| Panel size $k$ | Runtime |
|----------------|---------|
| 20             | < 4s    |
| 100            | < 7s    |
| 200            | < 10s   |
| 500            | < 20s   |
